# Supplementary material
Source: Springer Nature journal article supplement (https://www.springermedizin.de/resource/supplementary/13000_2012_659_MOESM1_ESM.pdf/9624864)

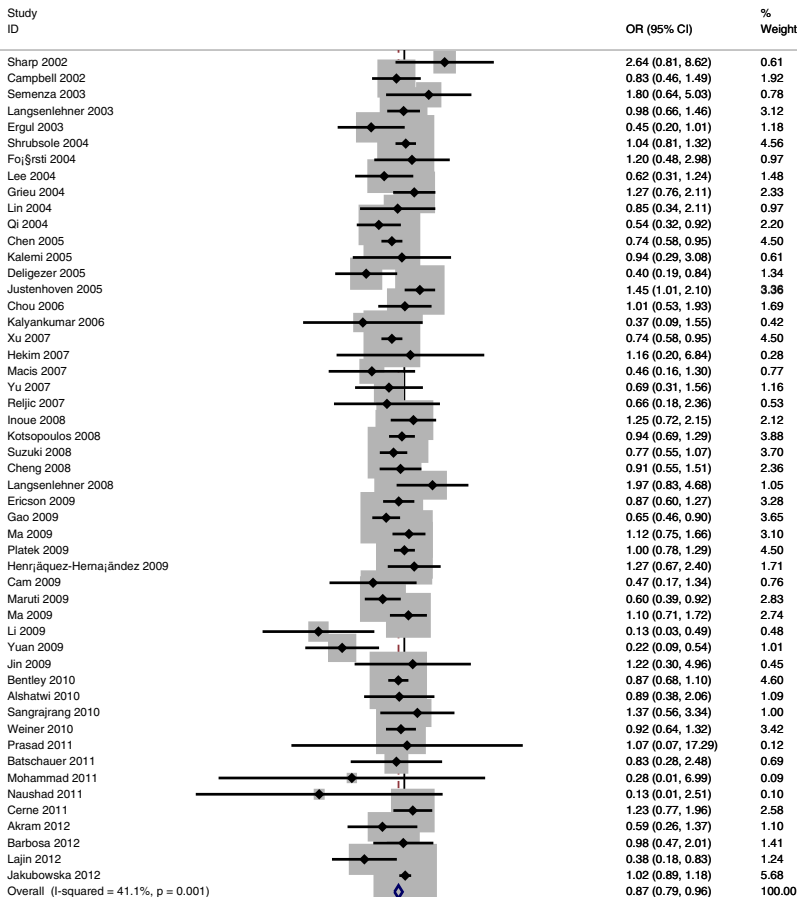

NOTE: Weights are from random effects analysis

0.00662

1

151

Supplement: MOESM1 [file 9624864]
